# Supplementary material for: Ferroptosis is induced by lenvatinib through fibroblast growth factor receptor‐4 inhibition in hepatocellular carcinoma
Source: PubMed Central journal article supplement — Cancer Sci. 2022 May 26;113(7):2272–87. doi: 10.1111/cas.15378 (PMC9277415; doi:10.1111/cas.15378), 2022-05-26
Supplement: CAS-113-2272-s001.pdf [file CAS-113-2272-s001.pdf]

# S.Figure1

A

HuH7

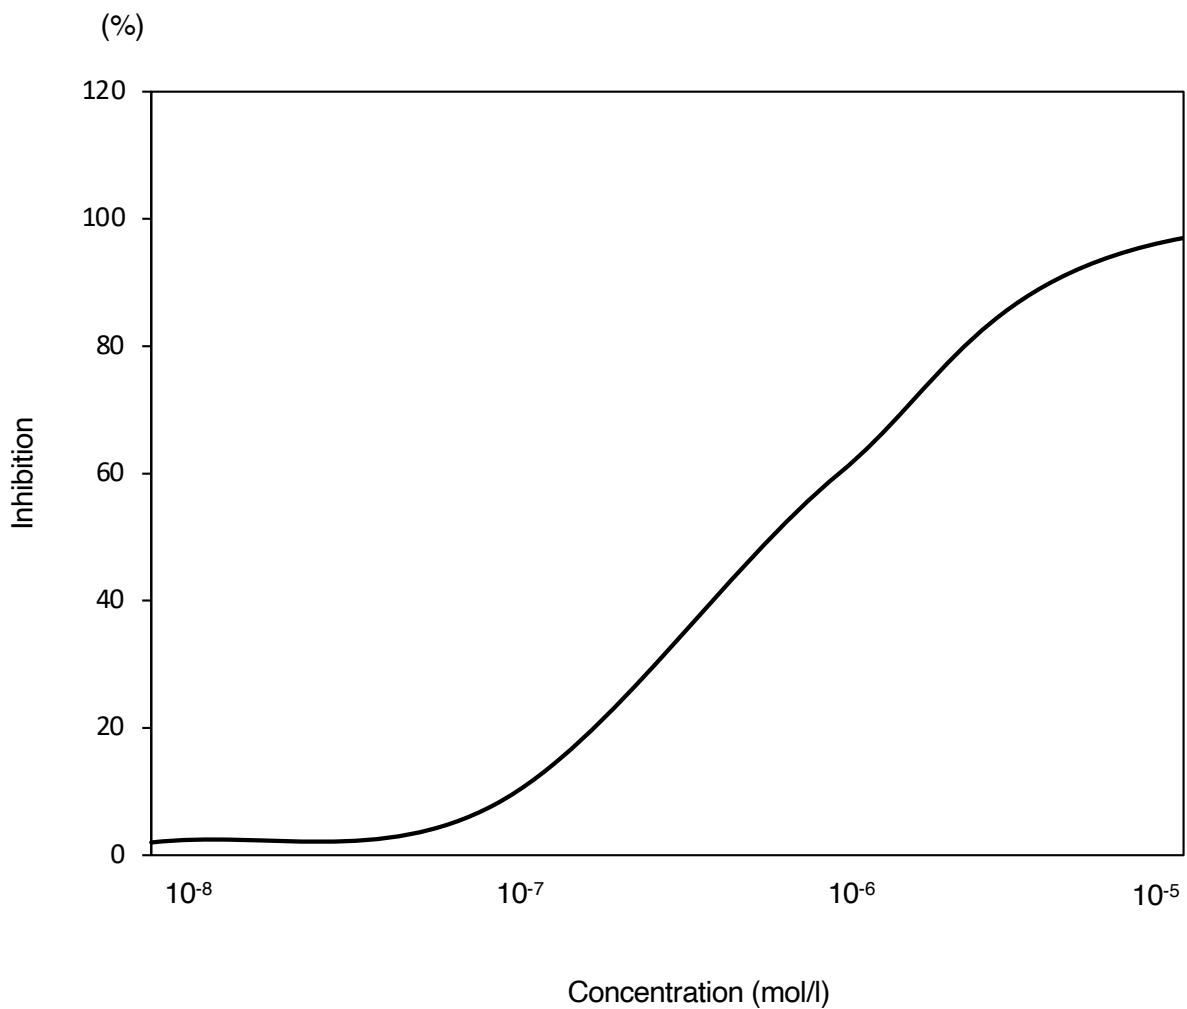

**Figure S1. In vitro antiproliferative activity of lenvatinib in Hepatocellular carcinoma cell (HCC) lines.**

Lenvatinib inhibited the proliferation of HuH7 (A) and Hep3B (B) cells with  $IC_{50}$  values of 0.76 and 0.34  $\mu$ M, respectively.

Inhibition of HCC cell proliferation by lenvatinib in HuH7 (A) and Hep3B (B).

# S.Figure1

B

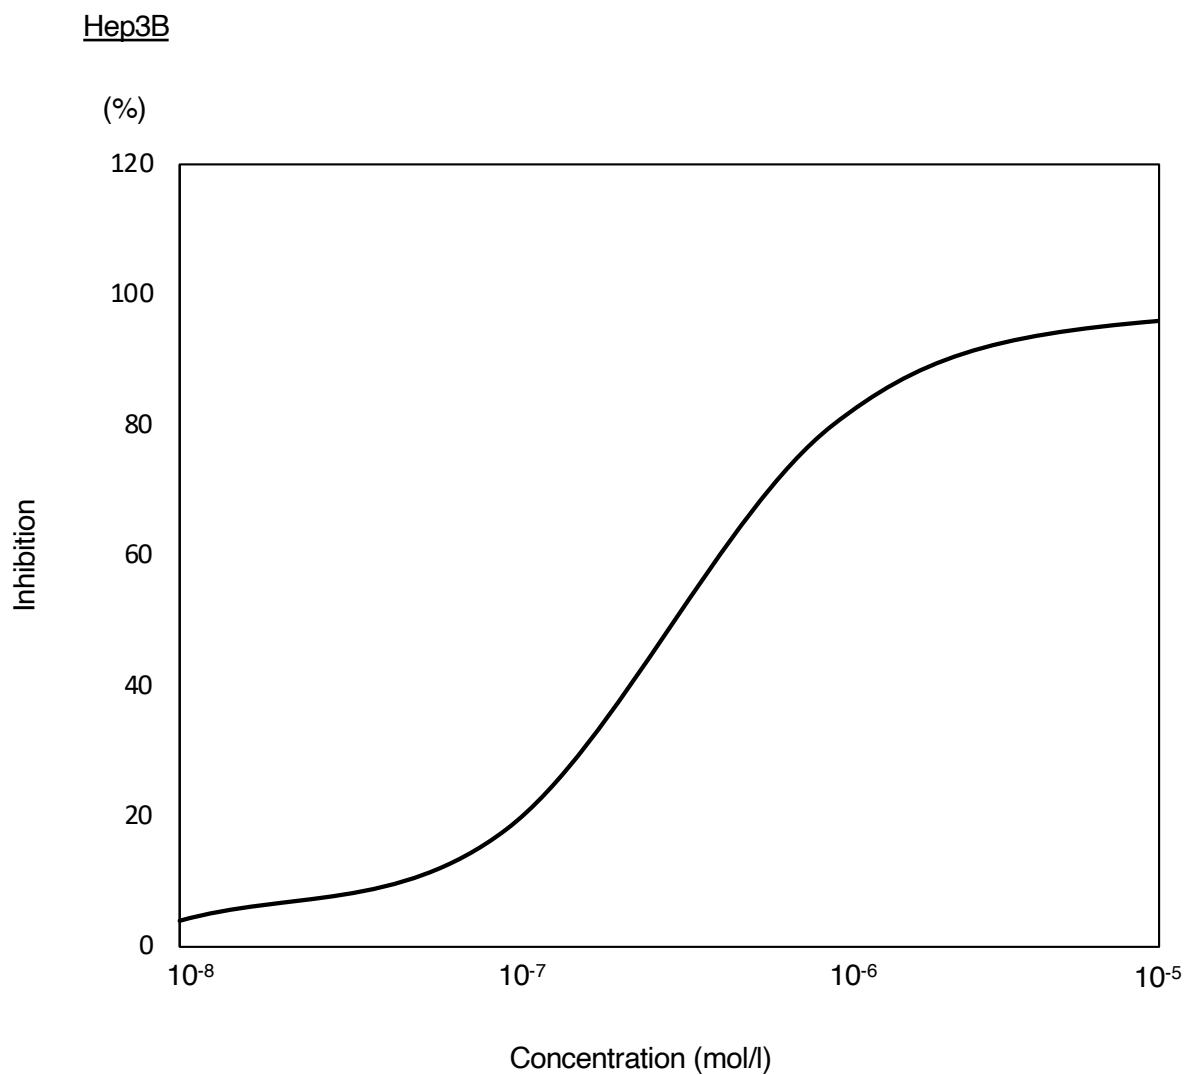

**Figure S1. In vitro antiproliferative activity of lenvatinib in Hepatocellular carcinoma cell (HCC) lines.**

Lenvatinib inhibited the proliferation of HuH7 (A) and Hep3B (B) cells with  $IC_{50}$  values of 0.76 and 0.34  $\mu$ M, respectively.

Inhibition of HCC cell proliferation by lenvatinib in HuH7 (A) and Hep3B (B).

# S.Figure2

## A

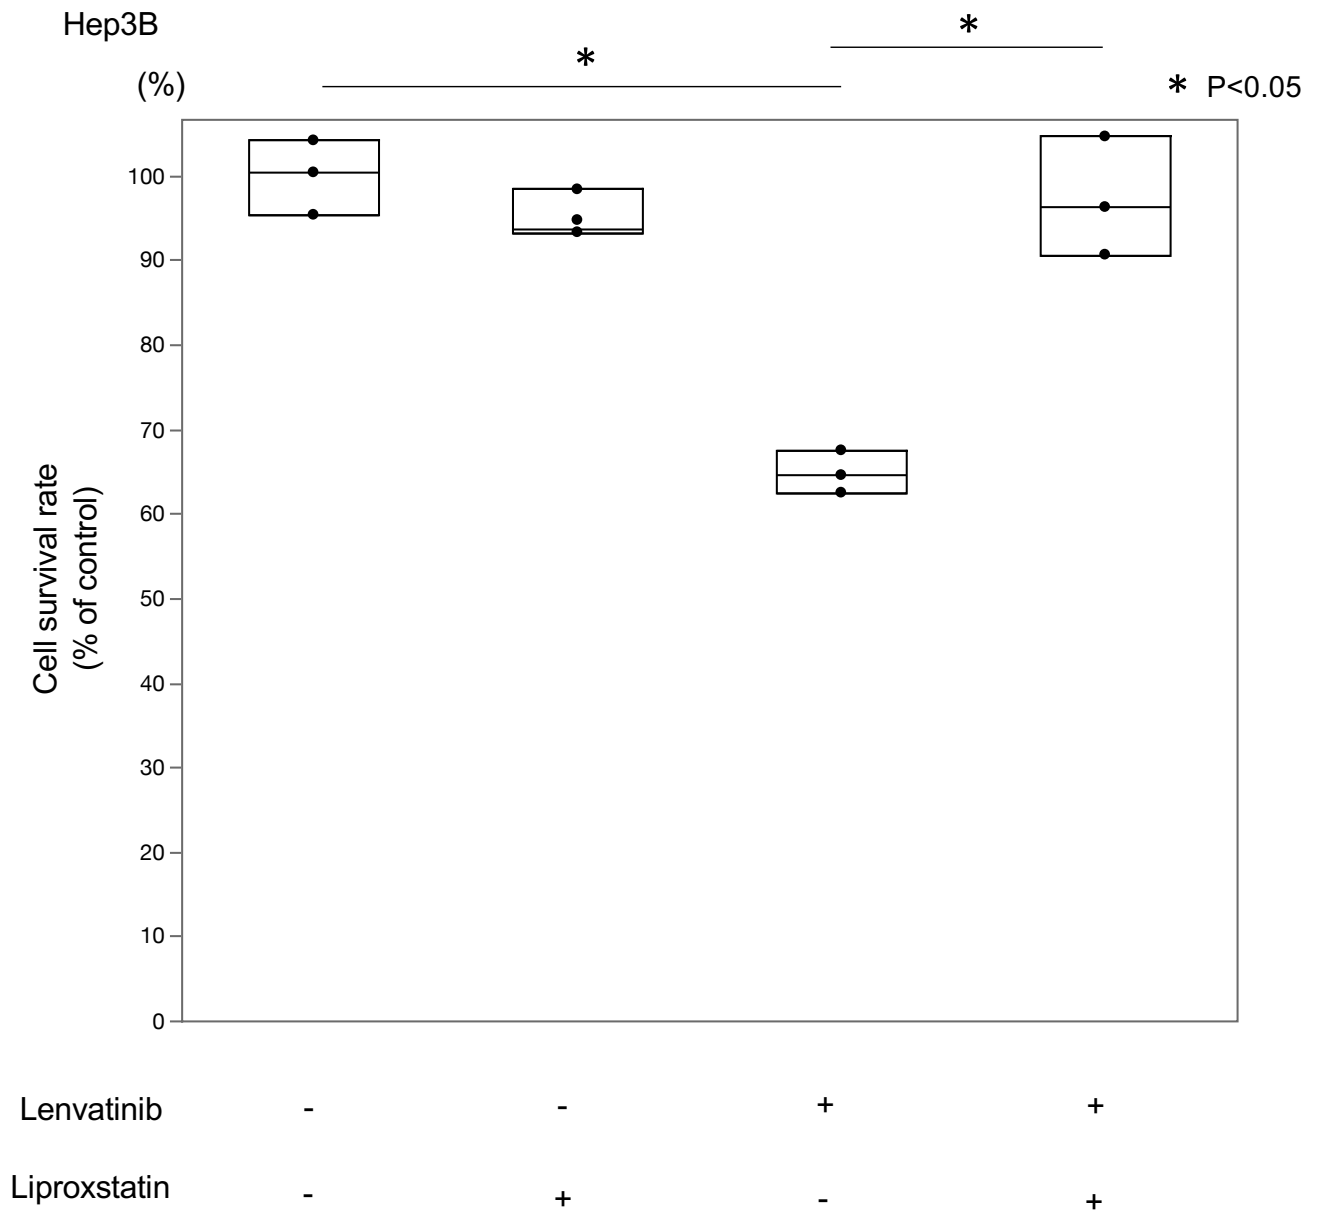

**Figure S2. Lenvatinib and Liproxstatin.**

The anti-tumor effect of Lenvatinib (0.4 $\mu$ M) was diminished by Liproxstatin (1 $\mu$ M) in Hep3B (A) and HuH7 (B).

# S.Figure2

## B

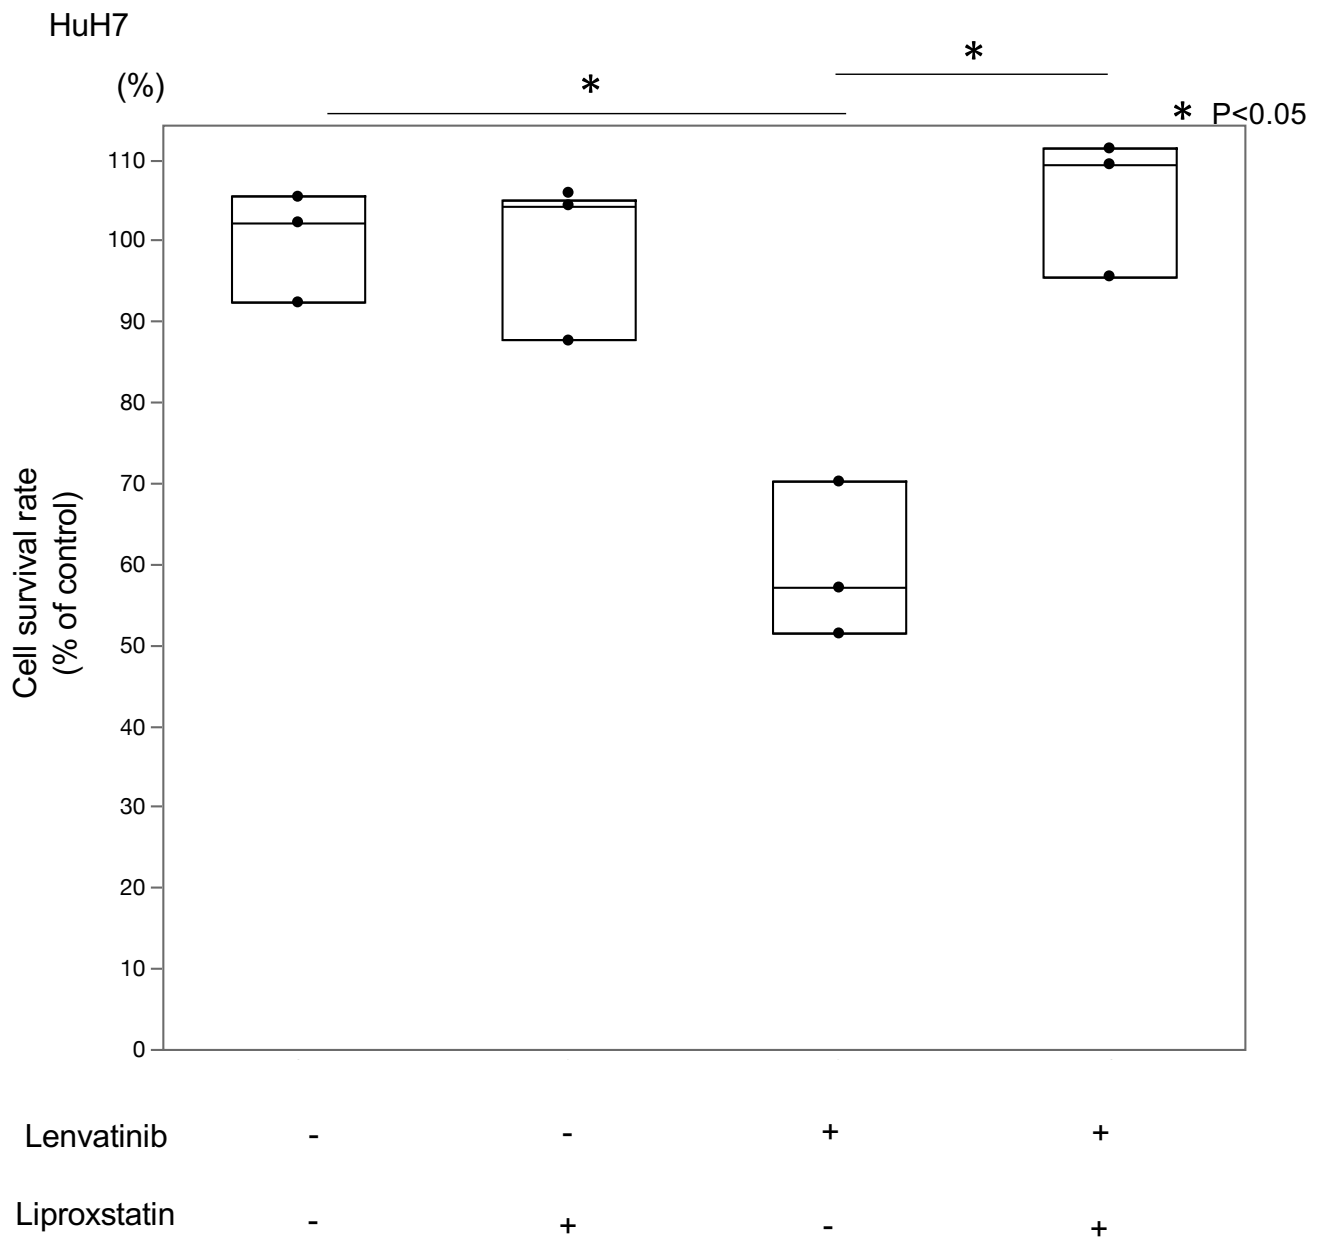

**Figure S2. Lenvatinib and Liproxstatin.**

The anti-tumor effect of Lenvatinib (0.4 $\mu$ M) was diminished by Liproxstatin (1 $\mu$ M) in Hep3B (A) and HuH7 (B).

## S.Figure3

A

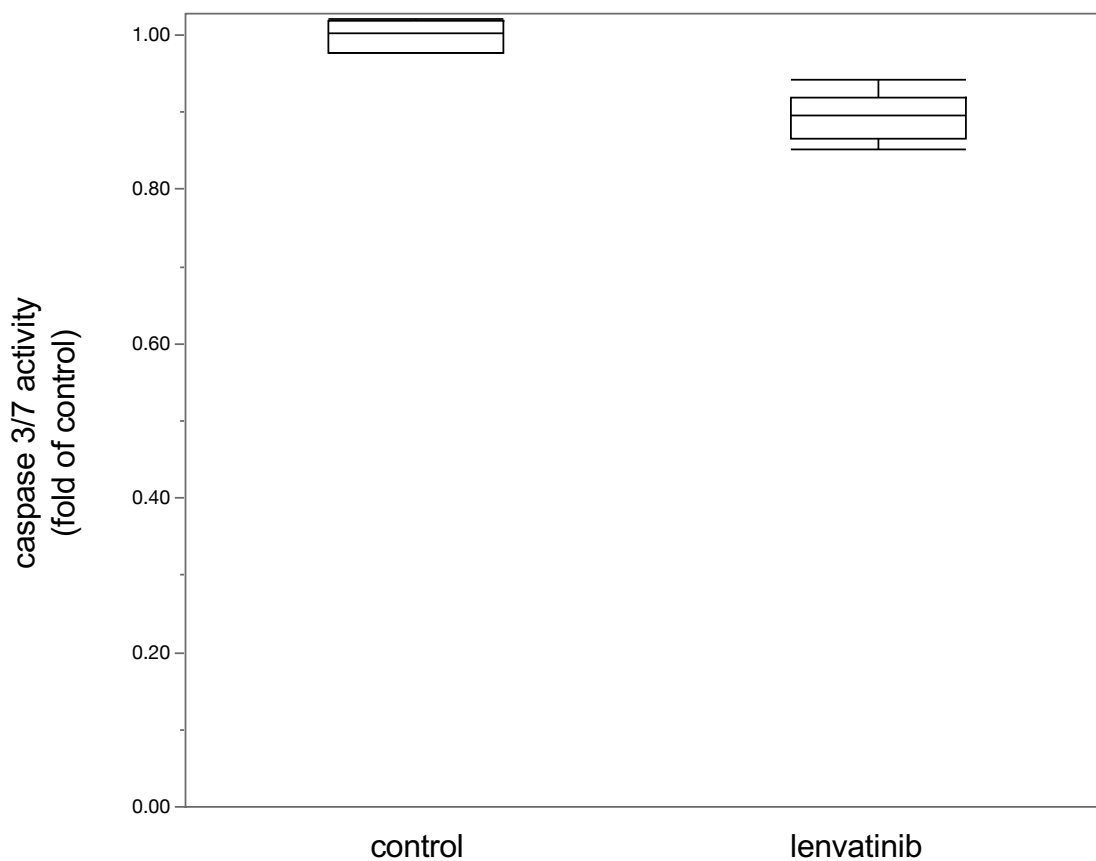

**Figure S3. The caspase-3/7 activity and Lenvatinib.**

The caspase-3/7 activity did not change in HuH7 (A) and Hep3B (B) cells treated with lenvatinib (HuH7: 0.8  $\mu$ M Hep3B: 0.4  $\mu$ M).

## S.Figure3

B

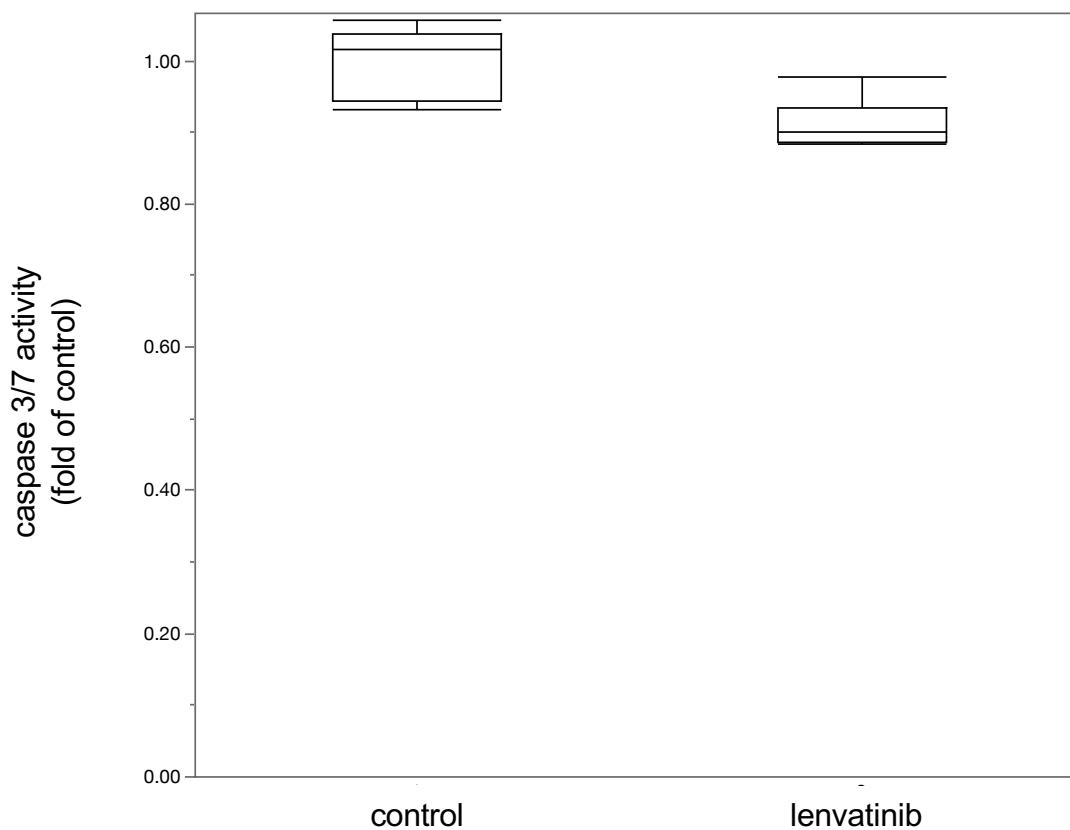

**Figure S3. The caspase-3/7 activity and Lenvatinib.**

The caspase-3/7 activity did not change in HuH7 (A) and Hep3B (B) cells treated with lenvatinib (HuH7: 0.8  $\mu$ M Hep3B: 0.4  $\mu$ M).

# S.Figure4

PLC

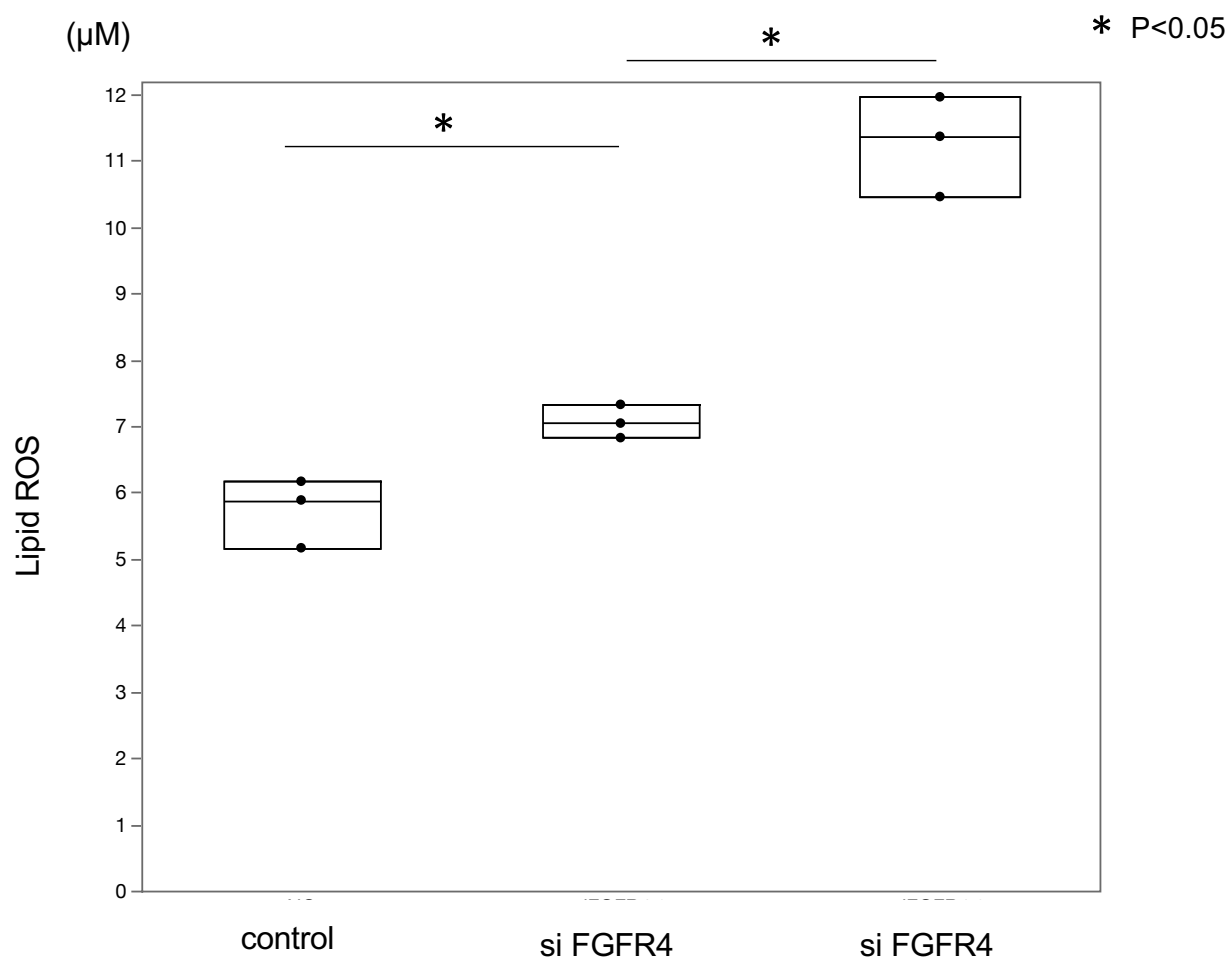

**Figure S4. Si-fibroblast growth factor receptor 4 (FGFR4) and lipid reactive oxygen species (ROS).**

Si-FGFR4 increased lipid ROS accumulation in PLC.

# S.Figure5

## A

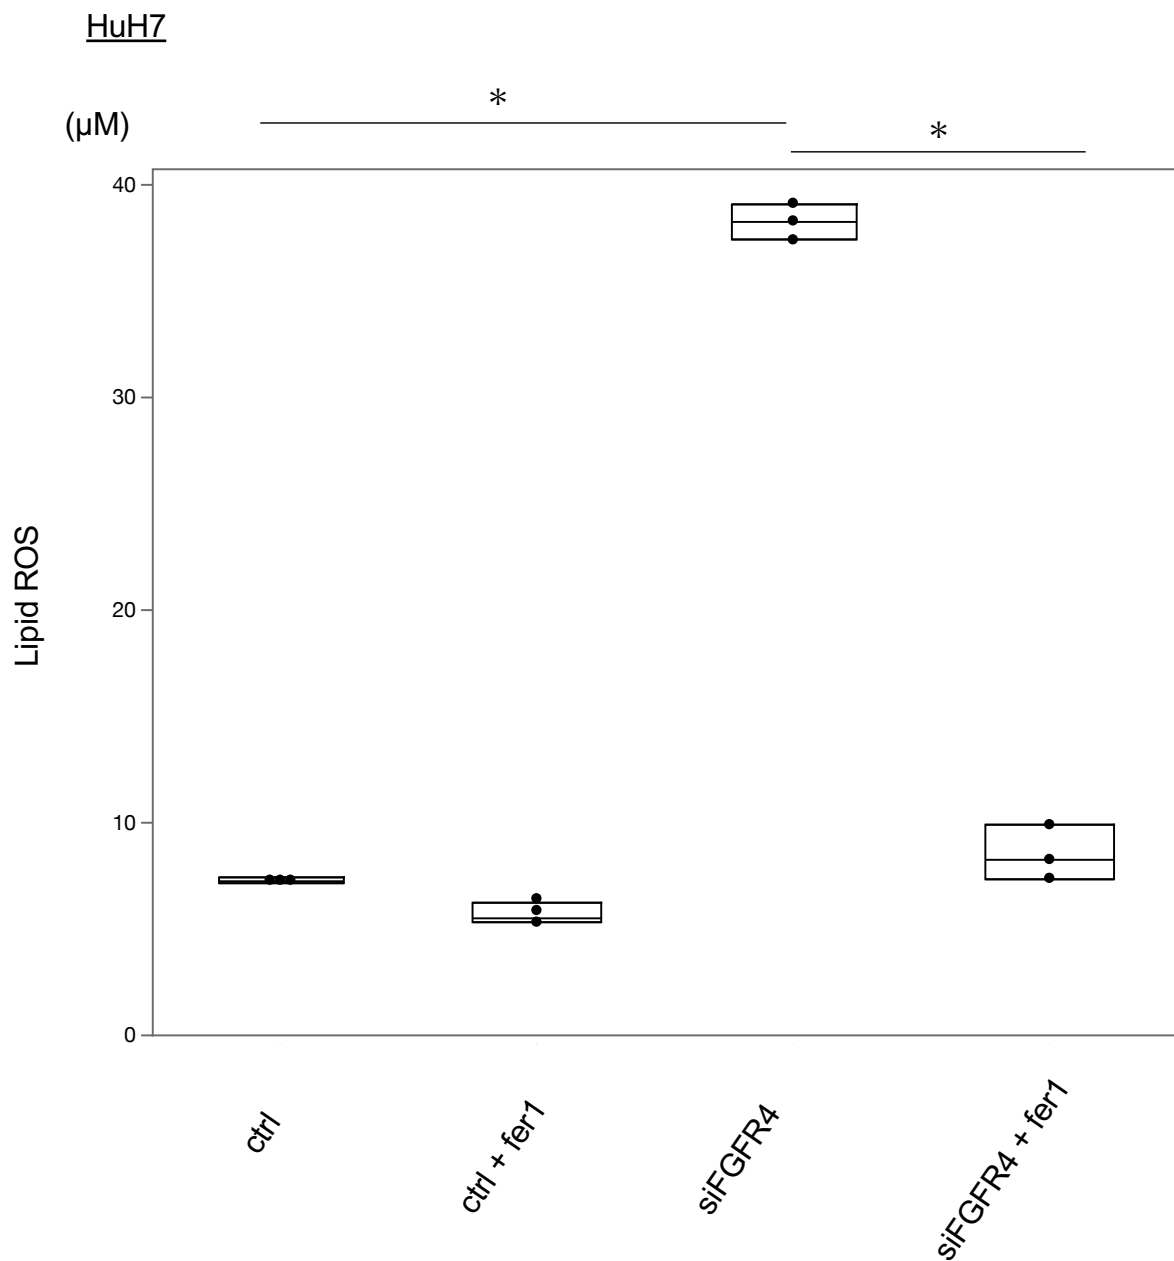

**Figure S5. Effect of si-fibroblast growth factor receptor 4 (FGFR4) in hepatocellular carcinoma cell line.**

Si-FGFR4 increased lipid reactive oxygen species accumulation (A,B) and suppressed cell survival (C,D).

\*P < 0.01 versus the control group.



# S.Figure5

## B

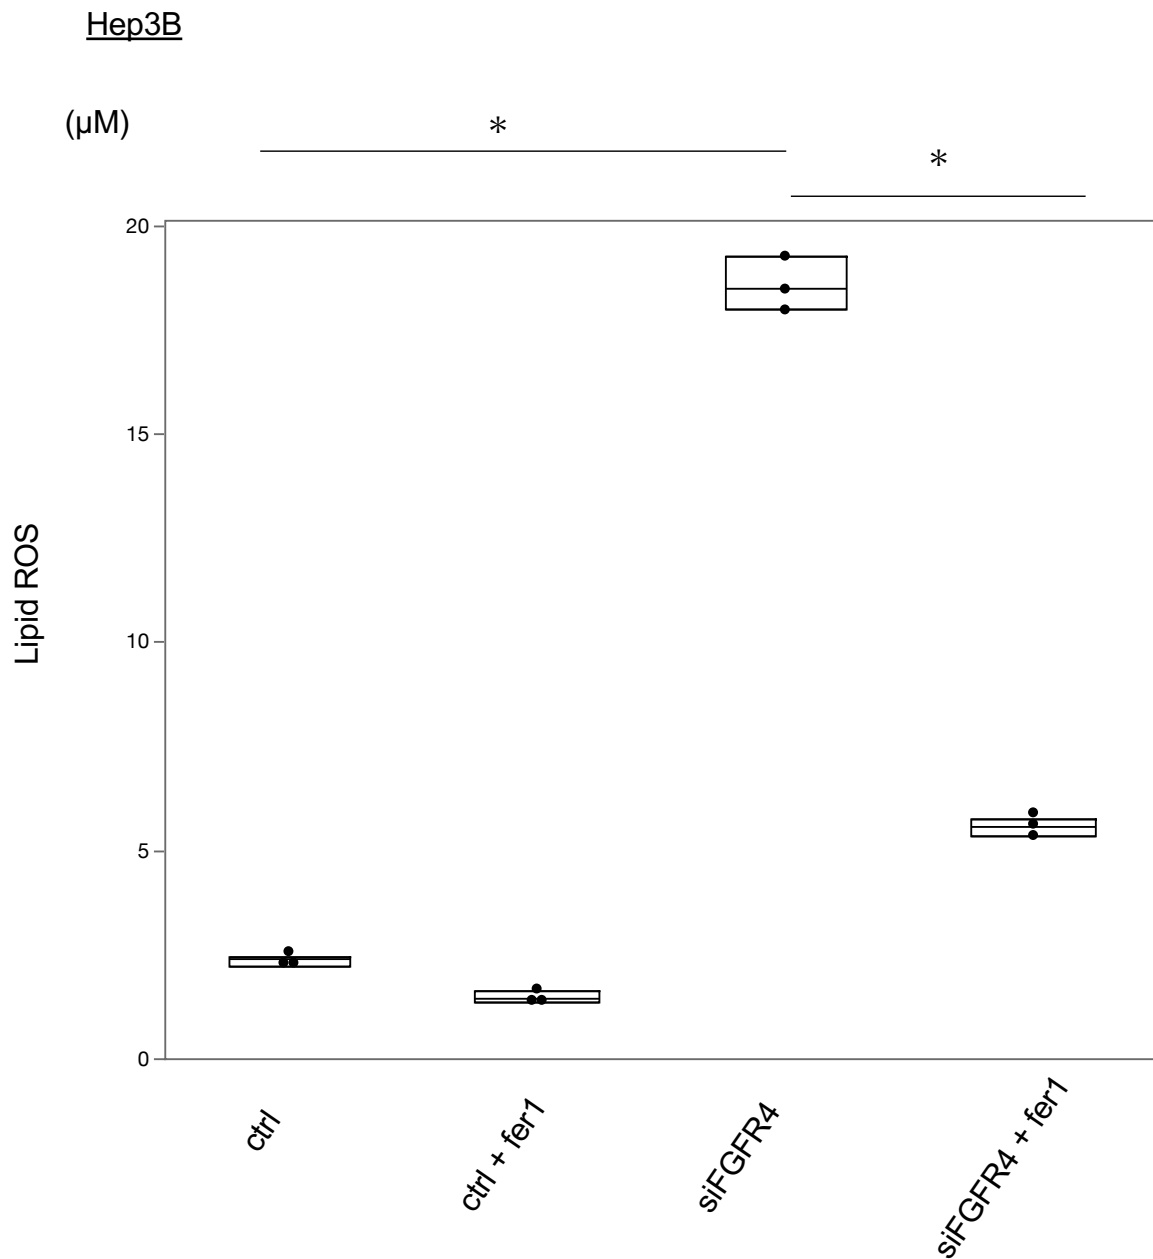

**Figure S5. Effect of si-fibroblast growth factor receptor 4 (FGFR4) in hepatocellular carcinoma cell line.**

Si-FGFR4 increased lipid reactive oxygen species accumulation (A,B) and suppressed cell survival (C,D).

\*P < 0.01 versus the control group.

S.Figure5

C

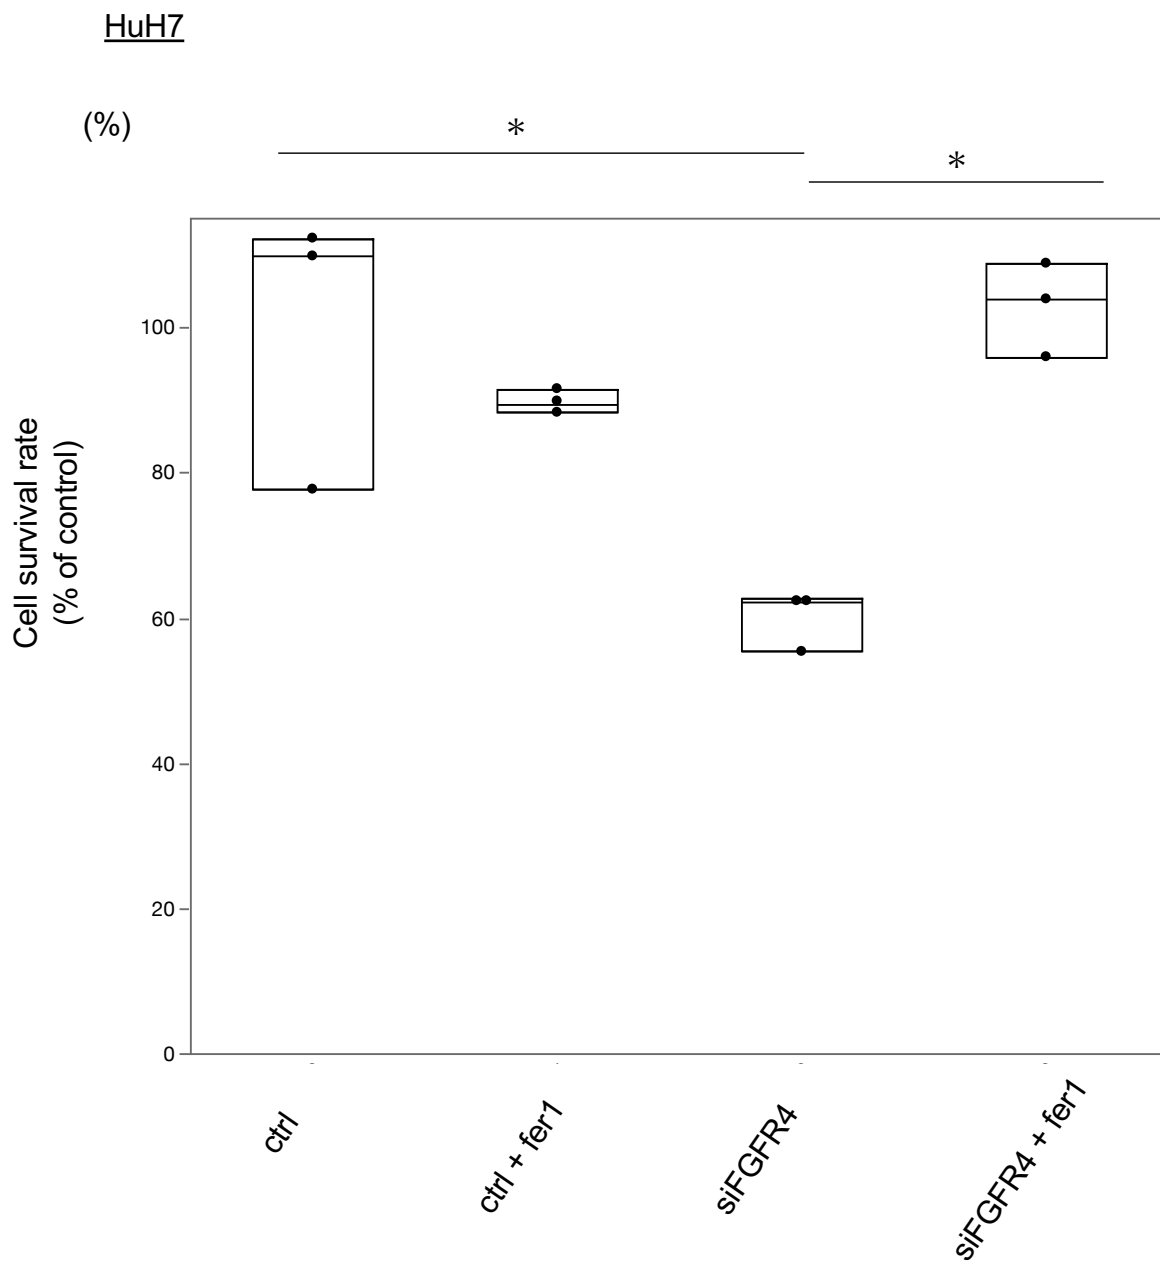

**Figure S5. Effect of si-fibroblast growth factor receptor 4 (FGFR4) in hepatocellular carcinoma cell line.**

Si-FGFR4 increased lipid reactive oxygen species accumulation (A,B) and suppressed cell survival (C,D).

\*P < 0.01 versus the control group.

# S.Figure5

## D

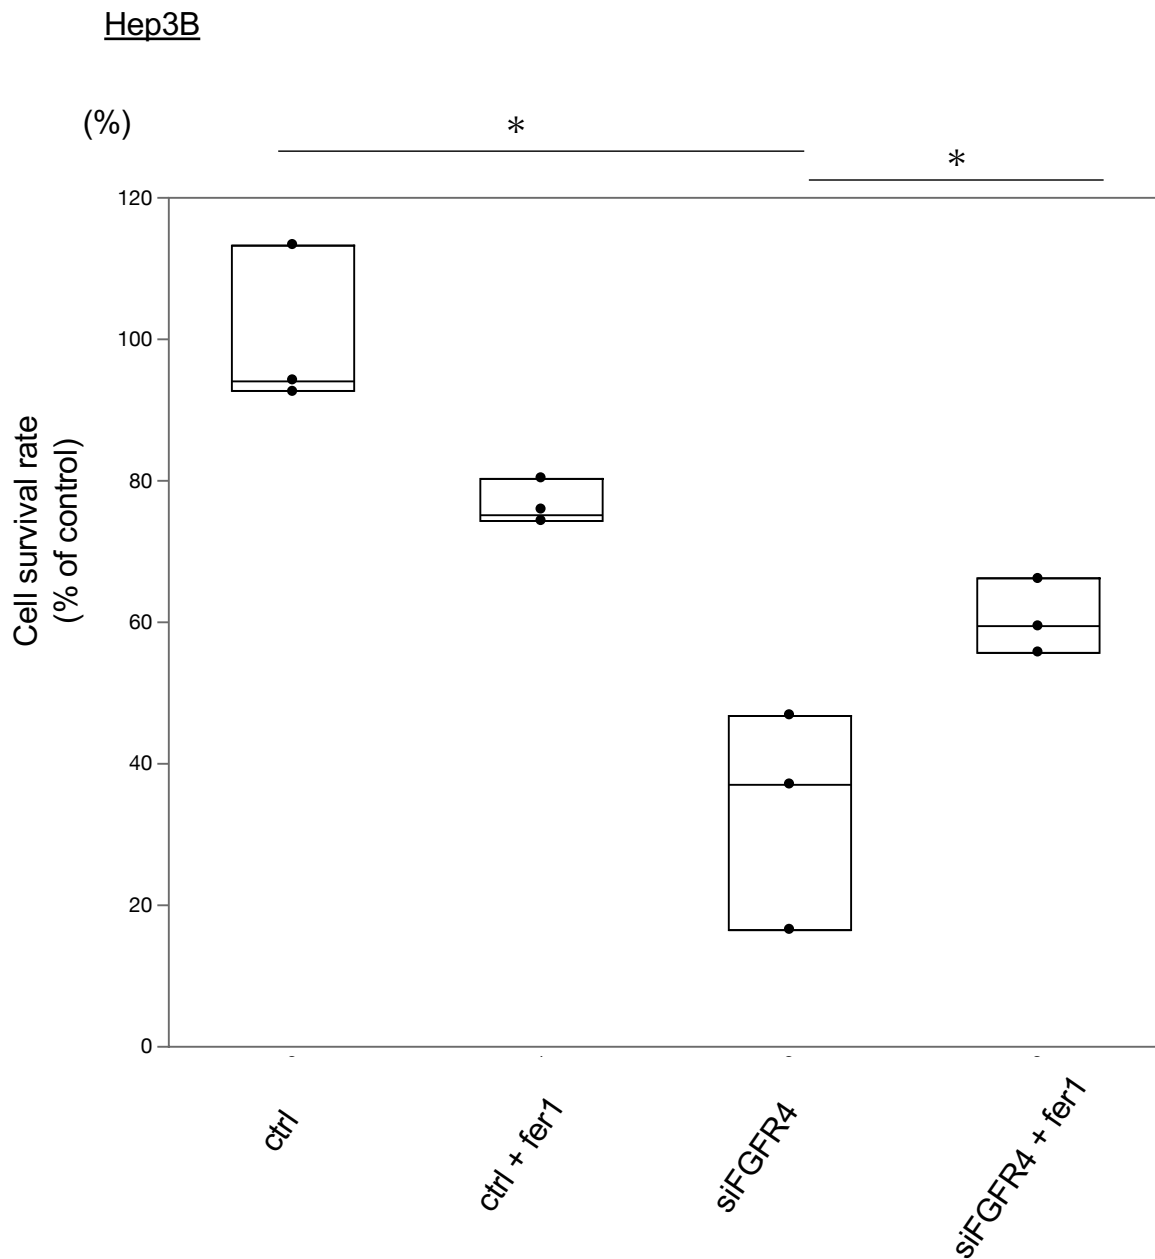

**Figure S5. Effect of si-fibroblast growth factor receptor 4 (FGFR4) in hepatocellular carcinoma cell line.**

Si-FGFR4 increased lipid reactive oxygen species accumulation (A,B) and suppressed cell survival (C,D).

\*P < 0.01 versus the control group.

# S.Figure6

## A

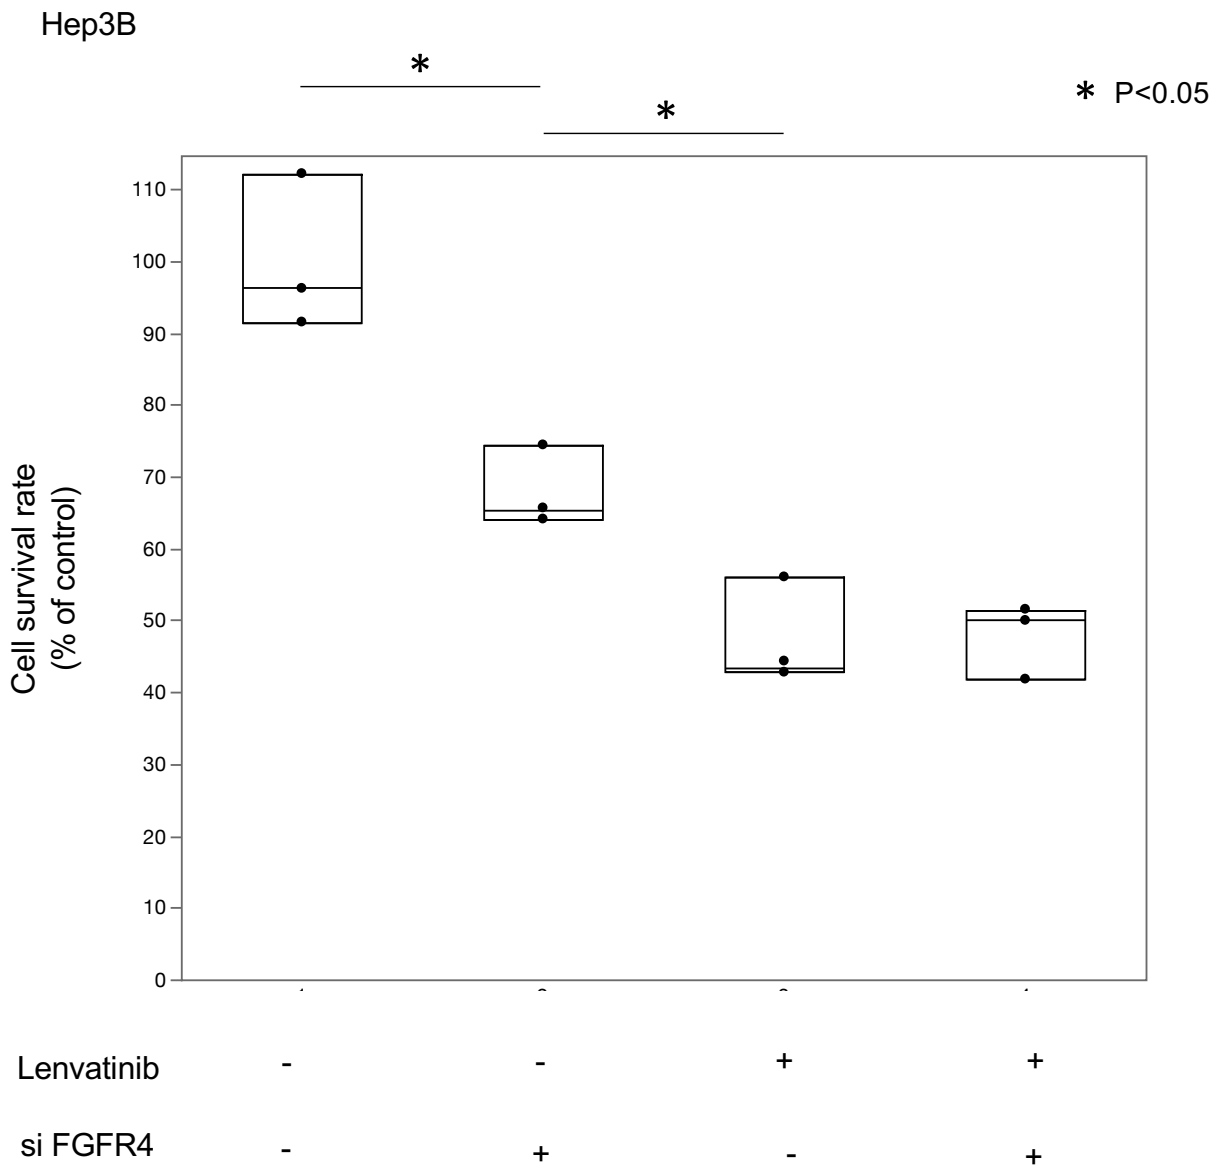

**Figure S6. Fibroblast growth factor receptor 4 (FGFR4) and Lenvatinib**  
The anti-tumor effect of Lenvatinib in the absence of FGFR4 in Hep3B (A) and HuH7 (B)

# S.Figure6

## B

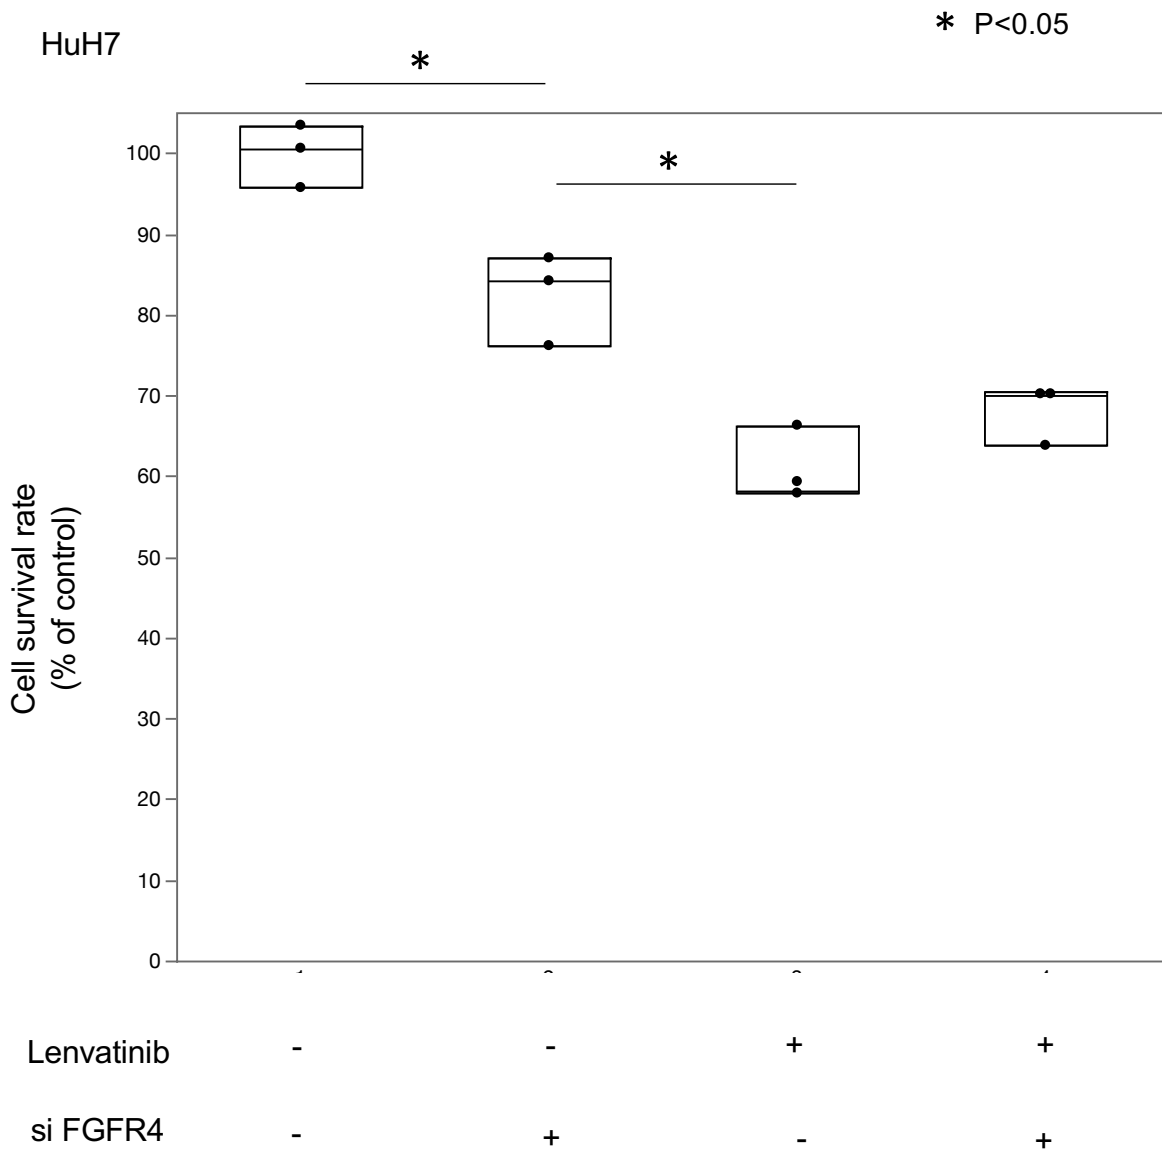

**Figure S6. Fibroblast growth factor receptor 4 (FGFR4) and Lenvatinib**  
The anti-tumor effect of Lenvatinib in the absence of FGFR4 in Hep3B (A) and HuH7 (B)

## S.Figure7

A

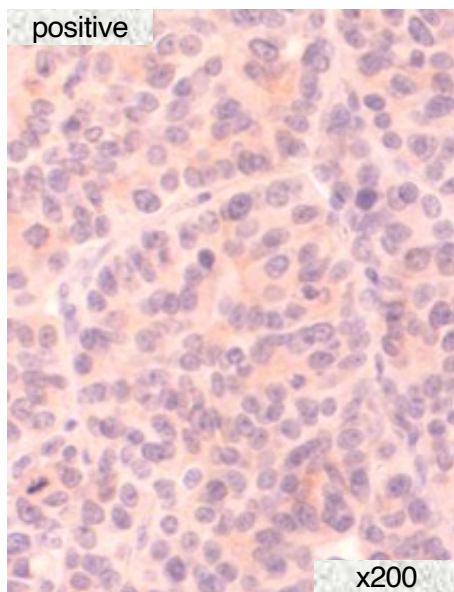

B

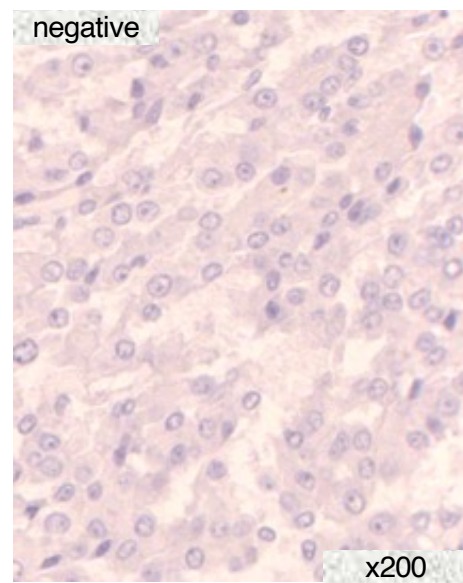

**Figure S7. Immunohistochemical staining of Fibroblast growth factor receptor 4 (FGFR4).** Staining for FGFR4 with positive (A), negative (B).

## S.Figure8

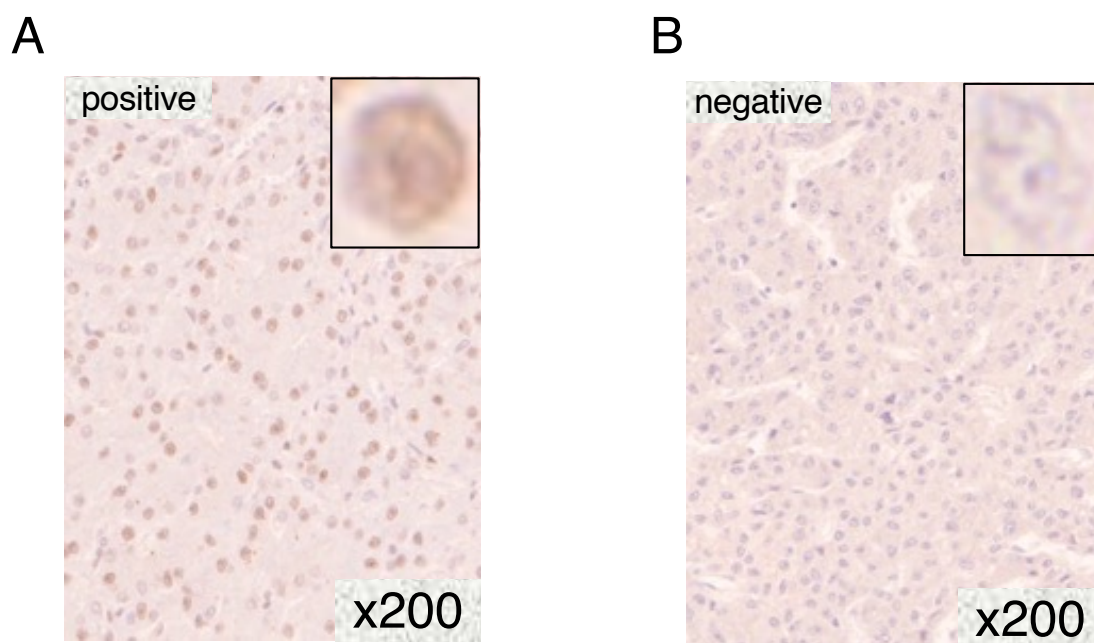

**Figure S8. The correlation between sensitivity to lenvatinib and P-Nrf2 expression in patients with hepatocellular carcinoma.**

Immunohistochemical staining of P-Nrf2. Staining for P-Nrf2 with positive (A), negative (B).

(C) Correlation between P-Nrf2 expression and sensitivity to lenvatinib.

(D) Progression-free survival in patients with P-Nrf2-positive and P-Nrf2-negative lesions.

# S.Figure8

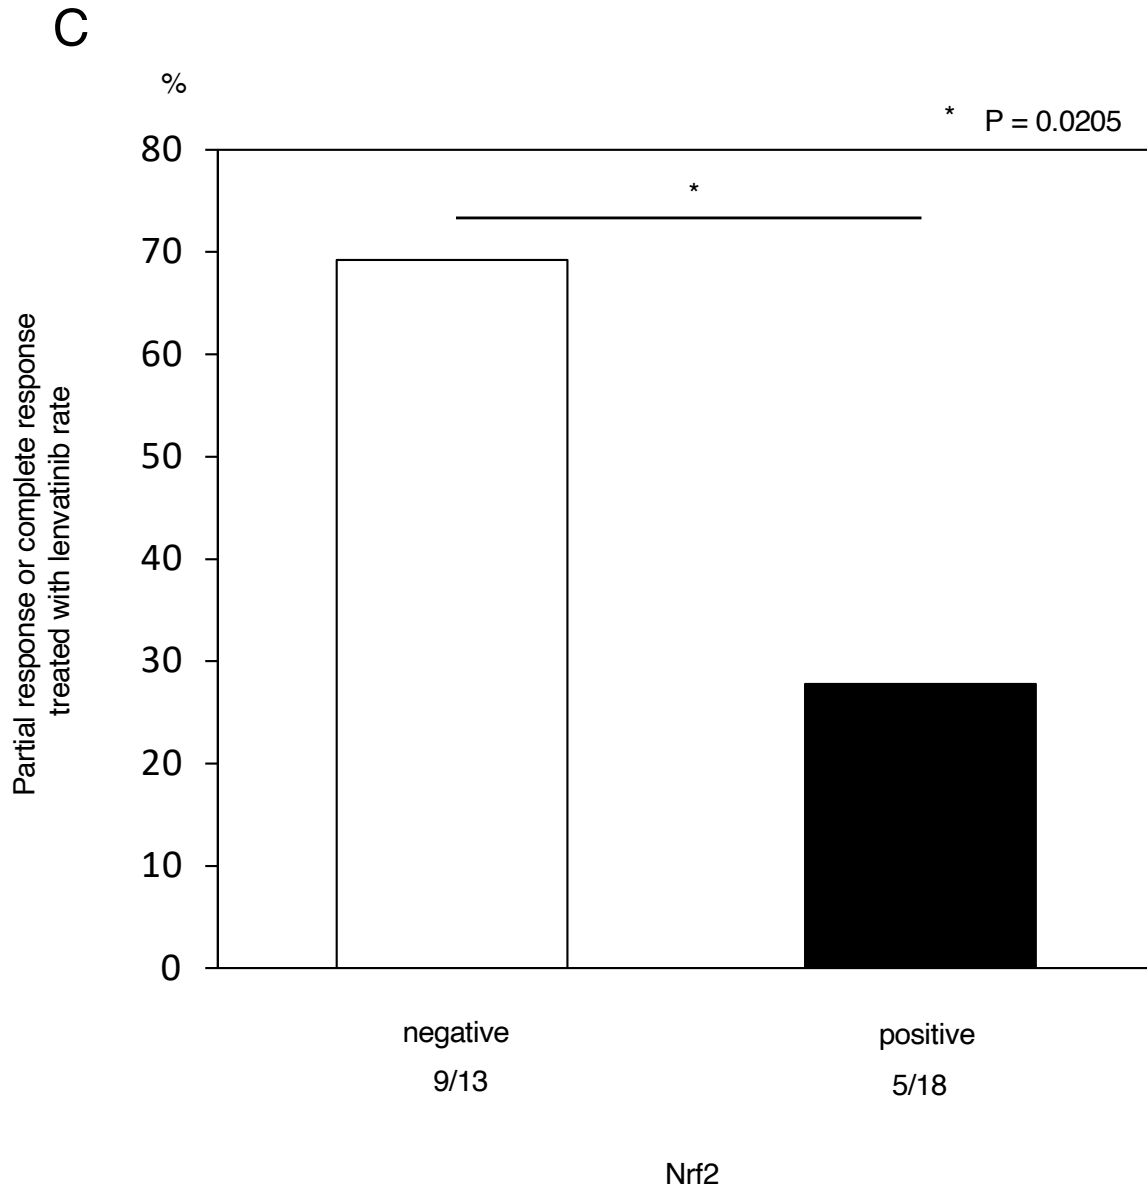

**Figure S8. The correlation between sensitivity to lenvatinib and P-Nrf2 expression in patients with hepatocellular carcinoma.**

Immunohistochemical staining of P-Nrf2. Staining for P-Nrf2 with positive (A), negative (B).

(C) Correlation between P-Nrf2 expression and sensitivity to lenvatinib.

(D) Progression-free survival in patients with P-Nrf2-positive and P-Nrf2-negative lesions.



## S.Figure8

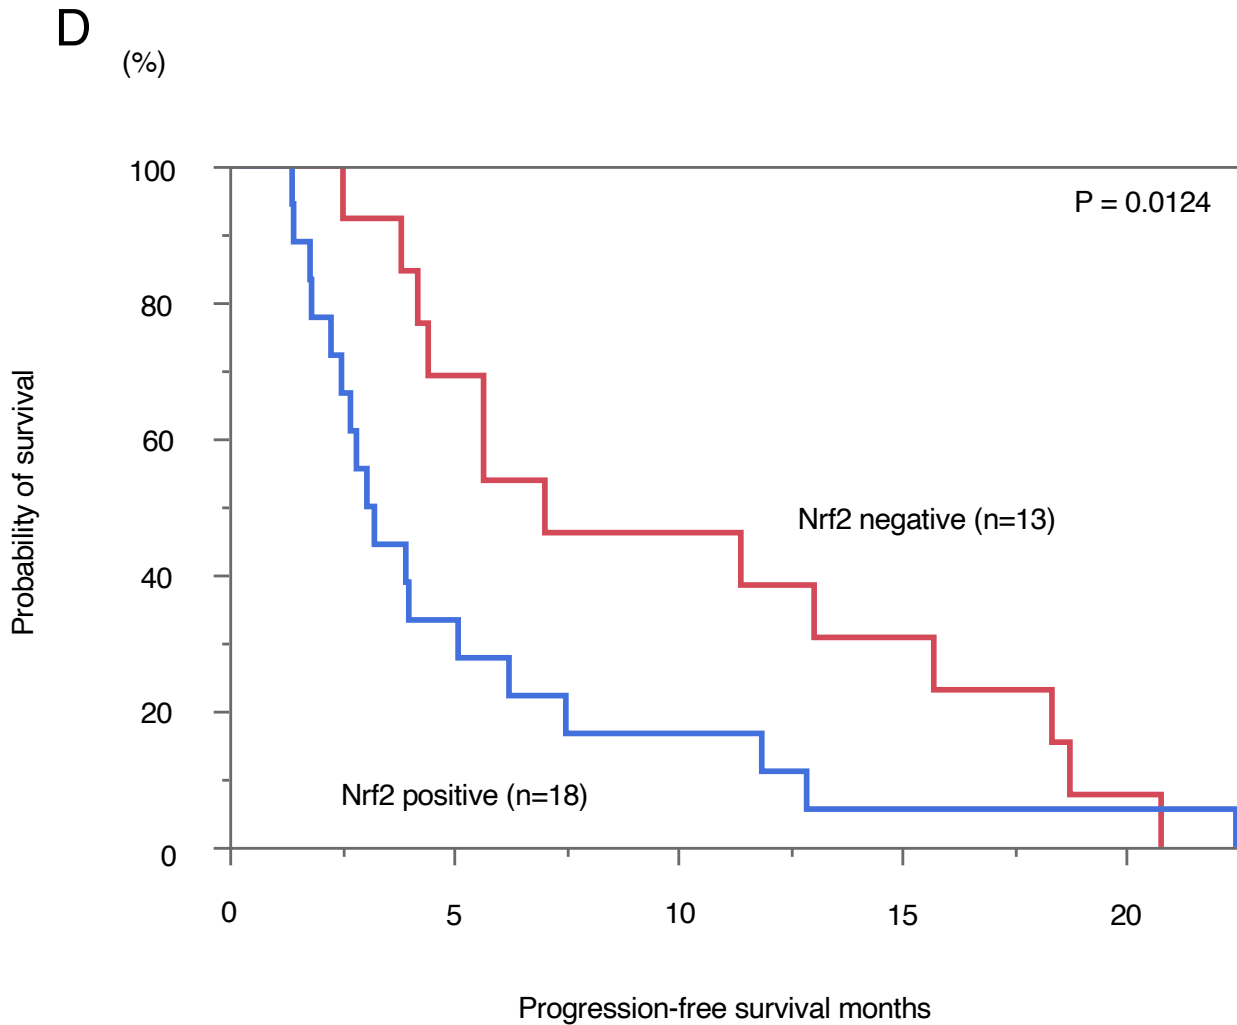

**Figure S8. The correlation between sensitivity to lenvatinib and P-Nrf2 expression in patients with hepatocellular carcinoma.**

Immunohistochemical staining of P-Nrf2. Staining for P-Nrf2 with positive (A), negative (B).

(C) Correlation between P-Nrf2 expression and sensitivity to lenvatinib.

(D) Progression-free survival in patients with P-Nrf2-positive and P-Nrf2-negative lesions.
